# Supplementary material for: Genomic legacy of the African cheetah, Acinonyx jubatus
Source: PubMed Central journal article supplement (PMC4676127; doi:10.1186/s13059-015-0837-4), 2015-12-10
Supplement: 13059_2015_837_MOESM2_ESM.pdf [file 13059_2015_837_MOESM2_ESM.pdf]

Supplemental Tables  
for  
Genomic Legacy of the African Cheetah,  
*Acinonyx jubatus*

## List of Tables

|            |                                                                                    |    |
|------------|------------------------------------------------------------------------------------|----|
| Table S1:  | Sequenced cheetah reads for de novo genome assembly                                | 3  |
| Table S2:  | Re-sequenced cheetah reads for population analyses . . .                           | 3  |
| Table S3:  | Estimated cheetah genome size . . . . .                                            | 3  |
| Table S4:  | Cheetah genome assembly information . . . . .                                      | 4  |
| Table S5:  | Reference-assisted assembly of cheetah chromosomes . .                             | 5  |
| Table S6:  | RepeatMasker results for transposable elements in car-<br>nivore genomes . . . . . | 6  |
| Table S7:  | Total length of repeat regions in cheetah . . . . .                                | 6  |
| Table S8:  | Tandem repeats in five carnivore genomes . . . . .                                 | 6  |
| Table S9:  | Complex tandem repeat families . . . . .                                           | 7  |
| Table S10: | Protein-coding gene annotation . . . . .                                           | 7  |
| Table S11: | Non-coding RNA annotation . . . . .                                                | 7  |
| Table S12: | Nuclear mitochondrial genes . . . . .                                              | 8  |
| Table S13: | Lengths of cheetah synteny blocks . . . . .                                        | 8  |
| Table S14: | Cheetah rearrangements . . . . .                                                   | 9  |
| Table S15: | Called SNV statistics . . . . .                                                    | 9  |
| Table S16: | SNV effects by impact . . . . .                                                    | 9  |
| Table S17: | SNV effects by functional class . . . . .                                          | 10 |
| Table S18: | SNV effects by genomic region . . . . .                                            | 10 |
| Table S19: | SNV locations relative to genes . . . . .                                          | 10 |
| Table S20: | SNV distribution in cheetah genome . . . . .                                       | 11 |
| Table S21: | SNV distribution in tiger genomes . . . . .                                        | 11 |
| Table S22: | SNV locations and effects in coding genes of Felidae<br>genomes . . . . .          | 12 |
| Table S23: | SNV counts in genes in domestic cat and tigers . . . .                             | 12 |
| Table S24: | SNV counts in genes in cheetahs . . . . .                                          | 13 |
| Table S25: | Nucleotide diversity in mitochondrial genomes of mam-<br>mals . . . . .            | 13 |
| Table S26: | Nucleotide diversity in MHC class I and II genes . . . .                           | 14 |
| Table S27: | Demographic models and their log-likelihood values . .                             | 15 |
| Table S28: | Population data by DaDi . . . . .                                                  | 15 |
| Table S29: | Reproductive system genes with identified function . .                             | 16 |
| Table S30: | Filtration of cheetah reproduction system genes . . . .                            | 17 |
| Table S31: | Nucleotide diversity of masked assemblies . . . . .                                | 18 |
| Table S32: | Statistics on autosomal segmental duplications . . . .                             | 19 |

Table S1: **The sequenced cheetah reads for the de novo assembly.** High quality data represents the clean data, which filter the low-quality score, duplication and PCR redundancy reads.

| Insert size (bp) | Read length (bp) | Raw data (Gb) | High-quality data (Gb) | Sequence coverage ( $\times$ ) |
|------------------|------------------|---------------|------------------------|--------------------------------|
| 170              | 100              | 102.20        | 67.97                  | 28.56                          |
| 500              | 100              | 50.48         | 38.70                  | 16.26                          |
| 800              | 100              | 38.49         | 26.40                  | 11.09                          |
| 2,000            | 49               | 33.89         | 18.53                  | 7.79                           |
| 5,000            | 49               | 45.71         | 10.44                  | 4.39                           |
| 10,000           | 49               | 27.27         | 6.51                   | 2.73                           |
| 20,000           | 49               | 24.26         | 9.76                   | 4.10                           |

Table S2: **The re-sequenced cheetah reads for the population analyses.** High quality data represents the clean data, which filter the low-quality score, duplication and PCR redundancy reads.

| Insert size (bp) | Read length (bp) | Raw data (Gb) | High-quality data (Gb) | Sequence depth ( $\times$ ) | Total mapped bases (Gb) | % Reads after filtration |
|------------------|------------------|---------------|------------------------|-----------------------------|-------------------------|--------------------------|
| 500              | 100              | 13.97         | 13.06                  | 5.49                        | 12.77                   | 97.76                    |
| 500              | 100              | 17.79         | 16.44                  | 6.91                        | 16.04                   | 97.57                    |
| 500              | 100              | 19.42         | 17.80                  | 7.48                        | 17.37                   | 97.57                    |
| 500              | 100              | 16.65         | 15.39                  | 6.47                        | 14.93                   | 96.98                    |
| 500              | 100              | 15.60         | 14.52                  | 6.10                        | 14.13                   | 97.32                    |
| 500              | 100              | 18.89         | 17.25                  | 7.25                        | 16.76                   | 97.14                    |

Table S3: **The estimated genome size for cheetah.** Using more than  $25\times$  raw reads to estimate the cheetah genome size.

| Kmer size | # Kmers        | Kmer depth ( $\times$ ) | Estimated genome size (bp) | Used bases (bp) | Depth ( $\times$ ) |
|-----------|----------------|-------------------------|----------------------------|-----------------|--------------------|
| 17        | 50,303,647,592 | 21                      | 2,395,411,790              | 68,595,883,080  | 28.64              |

Table S4: **The assembly information.** The total genome size of assembly for cheetah is about 2.38 Gb.

|                 | Contig        |        | Scaffold      |        |
|-----------------|---------------|--------|---------------|--------|
|                 | Size (bp)     | Number | Size (bp)     | Number |
| N90             | 6,675         | 87,953 | 817,533       | 784    |
| N80             | 11,732        | 61,999 | 1,417,882     | 568    |
| N70             | 16,749        | 45,401 | 1,986,090     | 427    |
| N60             | 22,136        | 33,294 | 2,460,097     | 320    |
| N50             | 28,224        | 23,952 | 3,121,442     | 233    |
| Longest         | 304,265       |        | 13,046,067    |        |
| Total size (bp) | 2,333,696,654 |        | 2,375,786,546 |        |

Table S5: **Statistics on the reference-assisted assembly of cheetah chromosomes.** The intragaps column gives the total length of gaps within the scaffolds that were assembled to a chromosome. The intergaps column gives the total length of gaps situated between the scaffolds of a chromosome.

| Chromosome                                             | # Intragaps | # Intergaps | # Scaffolds | Total length (bp) |
|--------------------------------------------------------|-------------|-------------|-------------|-------------------|
| A1                                                     | 2,676,546   | 21,786,027  | 95          | 244,616,204       |
| A2                                                     | 3,095,843   | 3,421,688   | 94          | 169,488,250       |
| A3                                                     | 2,234,714   | 6,462,378   | 72          | 146,614,859       |
| B1                                                     | 2,396,843   | 15,769,704  | 111         | 208,967,989       |
| B2                                                     | 2,142,340   | 5,807,146   | 94          | 158,072,724       |
| B3                                                     | 2,425,085   | 4,951,280   | 82          | 153,641,819       |
| B4                                                     | 2,111,389   | 8,753,595   | 58          | 145,667,879       |
| C1                                                     | 3,110,905   | 12,616,103  | 114         | 225,903,316       |
| C2                                                     | 1,830,801   | 4,896,233   | 79          | 161,030,742       |
| D1                                                     | 2,203,422   | 7,353,918   | 80          | 119,018,581       |
| D2                                                     | 1,168,337   | 4,642,075   | 42          | 90,695,764        |
| D3                                                     | 1,432,032   | 3,536,984   | 68          | 98,158,025        |
| D4                                                     | 1,825,900   | 4,074,642   | 61          | 98,516,449        |
| E1                                                     | 1,707,661   | 8,039,036   | 65          | 64,109,970        |
| E2                                                     | 1,469,428   | 6,987,499   | 60          | 65,905,433        |
| E3                                                     | 1,264,052   | 3,897,881   | 21          | 43,588,344        |
| F1                                                     | 1,453,485   | 2,873,379   | 44          | 72,411,080        |
| F2                                                     | 1,193,297   | 2,303,763   | 46          | 84,041,130        |
| X                                                      | 4,587,499   | 10,723,712  | 233         | 131,400,970       |
| Total                                                  | 40,329,579  | 138,897,043 | 1,519       | 2,481,849,528     |
| Total length of assembled fragments without intergaps: |             |             |             | 2,342,952,485     |
| Total length of all fragments:                         |             |             |             | 2,375,874,546     |
| Total length of unplaced and unlocalized fragments:    |             |             |             | 32,922,061        |

Table S6: **RepeatMasker results for TE in five carnivore genomes.** For each genome, percentages of total length of identified repeats relative to the genome size are given. All five genomes have similar percentage of masked genomes and similar proportion between the repeat families.

|                | Cheetah | Lion  | Cat   | Tiger | Dog   |
|----------------|---------|-------|-------|-------|-------|
| Masked portion | 39.48   | 38.94 | 39.17 | 39.15 | 39.97 |
| SINEs          | 10.80   | 10.82 | 10.98 | 10.84 | 10.37 |
| LINEs          | 20.28   | 19.85 | 20.02 | 19.95 | 20.18 |
| LTR elements   | 5.27    | 5.19  | 5.08  | 5.23  | 4.94  |
| DNA elements   | 2.94    | 2.89  | 2.82  | 2.93  | 2.79  |
| Other          | 0.14    | 0.14  | 0.22  | 0.15  | 1.64  |
| Unclassified   | 0.05    | 0.05  | 0.05  | 0.05  | 0.05  |
| Small RNA      | 8.03    | 8.10  | 8.32  | 8.09  | 7.81  |

Table S7: **The total length of repeat regions in cheetah.** In total, there are about 869 Mb (36.58% of the genome) of repeat regions, including DNA, LINE, LTR, SINE and other unclassified types.

| TE class | Size (bp)   | Percentage of genome (%) |
|----------|-------------|--------------------------|
| DNA      | 77,243,347  | 3.25                     |
| LINE     | 510,499,028 | 21.49                    |
| LTR      | 121,299,829 | 5.11                     |
| SINE     | 241,513,753 | 10.17                    |
| Other    | 5,697       | 0.00                     |
| Unknown  | 7,546,303   | 0.32                     |
| Total    | 868,991,259 | 36.58                    |

Table S8: **Tandem repeats in five carnivore genomes.** Felidae genomes have similar TRs profile and differ from the dog genome TR profile.

|                         | Cheetah | Lion    | Tiger   | Cat     | Dog       |
|-------------------------|---------|---------|---------|---------|-----------|
| All TRs                 | 851,094 | 955,312 | 891,574 | 882,953 | 1,085,732 |
| Microsatellites         | 329,761 | 366,015 | 339,997 | 361,992 | 309,032   |
| Perfect microsatellites | 132,548 | 150,769 | 135,625 | 152,612 | 135,903   |
| Complex TRs             | 3,457   | 3,555   | 3,270   | 4,038   | 7,492     |
| Large TRs >1 kbp        | 1,284   | 2,113   | 1,727   | 2,077   | 4,733     |
| Large TRs >3 kbp        | 165     | 263     | 196     | 245     | 2,931     |
| Large TRs >10 kbp       | 11      | 8       | 6       | 7       | 715       |

Table S9: **Complex tandem repeat families.**

| Family   | # Arrays | Monomer length in bp | GC%  | Predicted features                     |
|----------|----------|----------------------|------|----------------------------------------|
| Ajub33A  | 177      | 33                   | 51.0 | Predicted pericentromeric              |
| Ajub483A | 65       | 483                  | 50.5 | Predicted pericentromeric/pretelomeric |
| Ajub25A  | 50       | 25                   | 65.0 | —                                      |
| Ajub113A | 47       | 113                  | 39.0 | Predicted pericentromeric              |
| Ajub84A  | 277      | 84                   | 40.0 | Zinc-finger domains                    |

Table S10: **Statistics on protein-coding gene annotation.** In total, more than 20,000 protein-coding genes were predicted.

|       | Number  | Total length (Mb) | Percentage of genome (%) |
|-------|---------|-------------------|--------------------------|
| Genes | 20,343  | 601.20            | 25.30                    |
| CDS   | 174,408 | 29.00             | 1.22                     |

Table S11: **Statistics on non-coding RNA annotation.** For annotation of non-coding RNA elements, we used tRNAscan-SE (version 1.23) to search for tRNA-coding sequences. Vertebrate rRNA from the European ribosomal RNA database was used to predict DBM rRNA sequences. Rfam (version 9.1) combined with Infernal were used to predict small nuclear RNAs (snRNAs) and microRNAs (miRNAs).

| Type  | Subtype  | Copy Number | Average length (bp) | Total length (bp) | % of genome |
|-------|----------|-------------|---------------------|-------------------|-------------|
| miRNA |          | 43,878      | 102                 | 4,457,926         | 0.187633    |
| tRNA  |          | 62,321      | 84                  | 5,230,323         | 0.220143    |
| rRNA  | rRNA     | 530         | 81                  | 43,123            | 0.001815    |
|       | 18S      | 27          | 176                 | 4,759             | 0.000200    |
|       | 28S      | 96          | 100                 | 9,578             | 0.000403    |
|       | 5.8S     | 1           | 65                  | 65                | 0.000003    |
|       | 5S       | 406         | 71                  | 28,721            | 0.001209    |
| snRNA | snRNA    | 1,605       | 118                 | 189,141           | 0.007961    |
|       | CD-box   | 312         | 94                  | 29,247            | 0.001231    |
|       | HACA-box | 241         | 139                 | 33,446            | 0.001408    |
|       | Splicing | 1,014       | 120                 | 122,032           | 0.005136    |

Table S12: **Partial and complete nuclear mitochondrial genes.** In total, 143 potential Numts were found in the cheetah genome, their total size is 105,629 bp. From those, 50 are complete genes and 93 are partial matches.

| Gene name   | # Gene copies | Gene name   | # Gene copies |
|-------------|---------------|-------------|---------------|
| Complete    |               | Partial     |               |
| <i>RNA</i>  | 10            | <i>RNA</i>  | 31            |
| <i>ND6</i>  | 7             | <i>COX1</i> | 12            |
| <i>ND1</i>  | 5             | <i>CYTB</i> | 9             |
| <i>ND3</i>  | 5             | <i>COX2</i> | 7             |
| <i>COX3</i> | 4             | <i>ATP6</i> | 7             |
| <i>ND4L</i> | 4             | <i>ND1</i>  | 7             |
| <i>ATP8</i> | 3             | <i>ND5</i>  | 6             |
| <i>CYTB</i> | 3             | <i>ND2</i>  | 5             |
| <i>ND2</i>  | 3             | <i>COX3</i> | 4             |
| <i>COX2</i> | 2             | <i>ND4</i>  | 3             |
| <i>ATP6</i> | 2             | <i>ATP8</i> | 1             |
| <i>COX1</i> | 1             | <i>ND3</i>  | 1             |
| <i>ND4</i>  | 1             |             |               |

Table S13: **Lengths of synteny blocks in cheetah in relation to other species based on 5 species alignment.**

| Synteny block length statistics                             | <i>Felis catus</i> | <i>Panthera tigris</i> | <i>Panthera leo</i> | <i>Canis familiaris</i> |
|-------------------------------------------------------------|--------------------|------------------------|---------------------|-------------------------|
| Min                                                         | 0.3 Mb             | 0.3 Mb                 | 0.3 Mb              | 0.3 Mb                  |
| Max                                                         | 13.0 Mb            | 10.9 Mb                | 8.7 Mb              | 13.0 Mb                 |
| Median                                                      | 1.4 Mb             | 1.2 Mb                 | 0.9 Mb              | 1.4 Mb                  |
| Total length                                                | 2.34 Gb            | 2.31 Gb                | 2.27 Gb             | 2.28 Gb                 |
| Fraction of cheetah genome                                  | 98.6%              | 97.1%                  | 95.6%               | 96.0%                   |
| Median density of aligned anchors in cheetah synteny blocks | 96.7%              | 96.0%                  | 95.3%               | 87.1%                   |



Table S14: **The number of cheetah rearrangements obtained from 5 species multiple genome alignments with tiger, cat and dog genomes.** In parentheses, the numbers of rearrangements are given after excluding the whole-scaffold ones.

| Pairwise alignment | <i>Panthera tigris</i> | <i>Felis catus</i> | <i>Panthera leo</i> | <i>Canis familiaris</i> |
|--------------------|------------------------|--------------------|---------------------|-------------------------|
| Reversal           | 0                      | 7 (1)              | 4 (1)               | 14 (1)                  |
| Fusion             | 781 (22)               | 1,067 (11)         | 217 (3)             | 1,034 (178)             |
| Fission            | 163 (31)               | 4 (3)              | 92 (4)              | 0                       |
| Translocation      | 188 (27)               | 39 (4)             | 1,080 (113)         | 87 (19)                 |
| Overall            | 1,132 (80)             | 1,117 (19)         | 1,393 (121)         | 1,135 (198)             |

Table S15: **Statistic on called SNVs.** Total SNV count includes all SNV in coding regions and in repetitive elements. Singletons are SNV encountered only in one sample. An available sites is a genome size without unknown base pairs (Ns). SNV rate calculated as the total SNV number divided by the number of available sites.

| Total SNVs | # Singleton | Available sites | SNVs rate |
|------------|-------------|-----------------|-----------|
| 3,438,824  | 1,432,827   | 2,048,690,294   | 0.0016    |

Table S16: **SNV effects grouped by impact.** High, Low, Moderate and Modifier effects relate to potential impact on gene function, for more description please check the snpEff manual ([http://snpeff.sourceforge.net/SnpEff\\_manual.html](http://snpeff.sourceforge.net/SnpEff_manual.html)). AJU\_NAM and AJU\_TAN stand for cheetahs (*A. jubatus*) from Namibia and Tanzania, respectively.

|           | Modifier | Moderate | Low   | High |
|-----------|----------|----------|-------|------|
| AJU_NAM_1 | 526,197  | 4,029    | 2,853 | 647  |
| AJU_TAN_1 | 499,790  | 3,701    | 2,682 | 629  |
| AJU_TAN_2 | 534,540  | 3,958    | 2,827 | 813  |
| AJU_NAM_2 | 533,605  | 4,010    | 2,868 | 828  |
| AJU_TAN_3 | 496,620  | 3,779    | 2,709 | 617  |
| AJU_NAM_3 | 531,055  | 3,889    | 2,942 | 799  |
| AJU_NAM_4 | 526,189  | 4,882    | 2,939 | 680  |

Table S17: **SNV effects grouped by functional class.** Missense and nonsense effects result in an amino acid change of the protein encoded by a gene. A missense SNV leads to substitution of a single amino acid in a protein. A nonsense SNV causes a premature stop codon. A silent SNV does not alter the protein translated from a gene. AJU\_NAM and AJU\_TAN stand for cheetahs (*A. jubatus*) from Namibia and Tanzania, respectively.

|           | Silent | Missense | Nonsense |
|-----------|--------|----------|----------|
| AJU_NAM_1 | 2,322  | 4,041    | 134      |
| AJU_TAN_1 | 2,144  | 3,720    | 109      |
| AJU_TAN_2 | 2,206  | 3,971    | 159      |
| AJU_NAM_2 | 2,285  | 4,032    | 134      |
| AJU_TAN_3 | 2,174  | 3,797    | 106      |
| AJU_NAM_3 | 2,361  | 3,909    | 132      |
| AJU_NAM_4 | 2,321  | 4,901    | 130      |

Table S18: **SNV effects grouped by genomic region.** Both regions inside and outside protein-coding genes were considered. Upstream and downstream regions were defined as 5 kbp stretches surrounding a gene. Putative splice sites were considered to be of 2 bp long. AJU\_NAM and AJU\_TAN stand for cheetahs (*A. jubatus*) from Namibia and Tanzania, respectively.

|           | Downstream | Exon  | Intergenic | Intron  | Splice site |       | Upstream |        |
|-----------|------------|-------|------------|---------|-------------|-------|----------|--------|
|           |            |       |            |         | Acceptor    | Donor | Region   |        |
| AJU_NAM_1 | 20,906     | 6,761 | 364,130    | 122,791 | 58          | 179   | 531      | 18,370 |
| AJU_TAN_1 | 19,804     | 6,243 | 347,735    | 114,904 | 50          | 181   | 538      | 17,347 |
| AJU_TAN_2 | 21,203     | 6,735 | 370,760    | 123,953 | 70          | 173   | 620      | 18,624 |
| AJU_NAM_2 | 21,253     | 6,879 | 370,573    | 122,575 | 49          | 194   | 584      | 19,204 |
| AJU_TAN_3 | 19,661     | 6,350 | 343,955    | 115,369 | 49          | 172   | 534      | 17,635 |
| AJU_NAM_3 | 20,971     | 6,798 | 369,291    | 122,072 | 54          | 198   | 580      | 18,721 |
| AJU_NAM_4 | 21,128     | 7,625 | 363,638    | 122,511 | 59          | 199   | 618      | 18,912 |

Table S19: **SNVs locations in the cheetah genome relative to protein-coding genes.**

| SNV location        | Number    |
|---------------------|-----------|
| Outside genes       | 1,342,346 |
| Within genes        | 478,073   |
| Within gene exons   | 24,343    |
| Within gene introns | 453,730   |

Table S20: **Heterozygous SNV distribution in cheetah genome.** For each sample, we considered SNVs that were heterozygous in it. To estimate SNV distribution in the genome, we split it to non-overlapping 50 kbp windows and calculated minimum, median, average and maximum SNV counts in them. Heterozygous SNV rate was calculated as ratio of the heterozygous SNV number and the genome length. AJU\_NAM and AJU\_TAN stand for cheetahs (*A. jubatus*) from Namibia and Tanzania, respectively.

| Sample    | # Heterozygous SNVs |        |         |     |            |         | Heterozygous SNV rate |
|-----------|---------------------|--------|---------|-----|------------|---------|-----------------------|
|           | Min                 | Median | Average | Max | In windows | Total   |                       |
| AJU_NAM_1 | 0                   | 9      | 10.35   | 248 | 484,403    | 494,308 | 0.00020               |
| AJU_TAN_1 | 0                   | 8      | 9.82    | 330 | 459,588    | 469,343 | 0.00019               |
| AJU_TAN_2 | 0                   | 9      | 10.51   | 337 | 491,758    | 501,858 | 0.00021               |
| AJU_NAM_2 | 0                   | 9      | 10.49   | 253 | 490,857    | 500,450 | 0.00021               |
| AJU_TAN_3 | 0                   | 8      | 9.75    | 343 | 456,263    | 466,218 | 0.00019               |
| AJU_NAM_3 | 0                   | 9      | 10.44   | 348 | 488,607    | 498,729 | 0.00020               |
| AJU_NAM_4 | 0                   | 9      | 10.37   | 335 | 484,951    | 494,299 | 0.00020               |

Table S21: **Heterozygous SNV distribution in tiger genomes.** The SNV distribution was estimated in the same way as in Table S20. PTL\_BEN and PTL\_SIB stand for Bengal (*P. tigris tigris*) and Siberian (*P. tigris altaica*) tigers, respectively.

| Sample  | # Heterozygous SNVs |        |         |     |            |         | Heterozygous SNV rate |
|---------|---------------------|--------|---------|-----|------------|---------|-----------------------|
|         | Min                 | Median | Average | Max | In windows | Total   |                       |
| PTL_BEN | 0                   | 16     | 20.38   | 552 | 970,056    | 980,686 | 0.0004                |
| PTL_SIB | 0                   | 6      | 15.19   | 521 | 722,882    | 732,809 | 0.0003                |

Table S22: **Location and effect of heterozygous SNVs in coding genes of Felidae genomes.** FCA, PTI\_BEN and PTI\_SIB stand for domestic cat (*F. catus* “Boris”), Bengal (*P. tigris tigris*) and Siberian (*P. tigris altaica*) tigers, respectively. AJU\_NAM and AJU\_TAN stand for cheetahs (*A. jubatus*) from Namibia and Tanzania, respectively.

|           | SNV effect |                | Location in gene |         |
|-----------|------------|----------------|------------------|---------|
|           | Synonymous | Non-synonymous | Exon             | Intron  |
| FCA       | 20,713     | 12,143         | 34,002           | 947,752 |
| AJU_NAM_1 | 2,321      | 4,026          | 6,755            | 122,547 |
| AJU_TAN_1 | 2,144      | 3,701          | 6,235            | 114,652 |
| AJU_TAN_2 | 2,205      | 3,953          | 6,690            | 123,621 |
| AJU_NAM_2 | 2,284      | 4,006          | 6,832            | 122,307 |
| AJU_TAN_3 | 2,172      | 3,776          | 6,333            | 115,103 |
| AJU_NAM_3 | 2,360      | 3,888          | 6,759            | 121,818 |
| AJU_NAM_4 | 2,320      | 4,879          | 7,611            | 122,242 |
| PTI_BEN   | 5,394      | 4,197          | 9,677            | 293,605 |
| PTI_SIB   | 5,008      | 9,230          | 14,450           | 217,882 |

Table S23: **The numbers of genes with different heterozygous SNV counts in their coding regions for domestic cat (*F. catus*, FCA), Bengal (*P. tigris tigris*, PTI\_BEN) and Siberian (*P. tigris altaica*, PTI\_SIB) tigers.**

| #SNVs<br>in gene | FCA    | PTI_BEN | PTI_SIB |
|------------------|--------|---------|---------|
| 0                | 11,737 | 15,256  | 13,261  |
| 1                | 3,625  | 2,943   | 3,742   |
| 2                | 2,171  | 1,085   | 1,564   |
| 3                | 1,381  | 449     | 734     |
| 4                | 857    | 170     | 392     |
| 5                | 587    | 103     | 195     |
| 6                | 393    | 64      | 146     |
| 7                | 291    | 46      | 68      |
| 8                | 167    | 31      | 40      |
| 9                | 159    | 19      | 12      |
| >10              | 522    | 60      | 72      |

Table S24: **The numbers of genes with different heterozygous SNV counts in their coding regions for cheetahs.** AJU\_NAM and AJU\_TAN stand for cheetahs (*A. jubatus*) from Namibia and Tanzania, respectively.

| #SNVs<br>in gene | AJU_NAM.1 | AJU_TAN.1 | AJU_TAN.2 | AJU_NAM.2 | AJU_TAN.3 | AJU_NAM.3 | AJU_NAM.4 |
|------------------|-----------|-----------|-----------|-----------|-----------|-----------|-----------|
| 0                | 16,026    | 16,334    | 16,187    | 16,073    | 16,268    | 16,101    | 15,441    |
| 1                | 3,070     | 2,891     | 2,942     | 3,009     | 2,946     | 3,018     | 3,425     |
| 2                | 790       | 701       | 777       | 813       | 711       | 769       | 938       |
| 3                | 238       | 226       | 219       | 238       | 217       | 241       | 324       |
| 4                | 91        | 86        | 89        | 109       | 86        | 105       | 96        |
| 5                | 48        | 30        | 49        | 22        | 43        | 35        | 44        |
| 6                | 27        | 20        | 30        | 26        | 18        | 19        | 23        |
| 7                | 19        | 10        | 10        | 8         | 11        | 17        | 14        |
| 8                | 6         | 9         | 7         | 6         | 10        | 7         | 7         |
| 9                | 2         | 11        | 3         | 6         | 5         | 4         | 9         |
| >10              | 25        | 24        | 29        | 32        | 27        | 26        | 21        |

Table S25: **Nucleotide diversity in mitochondrial genomes among mammals.** Pi measure is defined as the average number of nucleotide differences per site between any two DNA sequences chosen randomly from the sample population. Standard deviation (SD) of Pi is also given.

| Species                      | Pi       | SD       |
|------------------------------|----------|----------|
| <i>A. jubatus</i> (Tanzania) | 8.00E-05 | 3.00E-05 |
| <i>A. jubatus</i> (Namibia)  | 7.10E-04 | 3.30E-04 |
| <i>B. bison</i>              | 7.90E-04 | 7.00E-05 |
| <i>B. taurus</i>             | 8.60E-04 | 1.50E-04 |
| <i>O. orca</i>               | 1.20E-03 | 2.10E-04 |
| <i>H. sapiens</i>            | 1.65E-03 | 8.00E-05 |
| <i>C. lupus familiaris</i>   | 3.31E-03 | 1.00E-04 |
| <i>E. caballus</i>           | 3.80E-03 | 1.00E-04 |
| <i>C. lupus</i>              | 5.18E-03 | 3.70E-04 |
| <i>P. troglodytes</i>        | 5.38E-03 | 2.00E-07 |

Table S26: **Nucleotide diversity in predicted class II and I MHC genes.** Gene completeness was assessed by presence of conservative domains: if the domains were present partially, then a gene was denoted as of partial completeness, otherwise — as of full. S and NS stand for synonymous and non-synonymous SNVs. MHC gene annotation for cat (*F. catus*) was taken from [1]. The NA value for a cat MHC gene means that the gene was not annotated in the original paper.

| Class | Gene name    | Completeness | #SNVs in          |    | #SNVs in        |    |
|-------|--------------|--------------|-------------------|----|-----------------|----|
|       |              |              | <i>A. jubatus</i> |    | <i>F. catus</i> |    |
|       |              |              | S                 | NS | S               | NS |
| II    | <i>DRBp</i>  | Full         | 1                 | 4  | NA              | NA |
| II    | <i>DRAp</i>  | Partial      | 0                 | 3  | NA              | NA |
| II    | <i>DNA</i>   | Full         | 1                 | 5  | NA              | NA |
| II    | <i>DMA</i>   | Full         | 0                 | 2  | NA              | NA |
| II    | <i>DMB</i>   | Full         | 0                 | 0  | NA              | NA |
| II    | <i>DOB</i>   | Full         | 1                 | 0  | NA              | NA |
| II    | <i>DRB4</i>  | Full         | 1                 | 1  | 8               | 25 |
| II    | <i>DRB1</i>  | Partial      | 0                 | 0  | 1               | 2  |
| II    | <i>DRA1</i>  | Full         | 0                 | 0  | 2               | 0  |
| II    | <i>DRB3</i>  | Full         | 0                 | 0  | 5               | 13 |
| II    | <i>DRA2</i>  | Full         | 0                 | 0  | 0               | 0  |
| II    | <i>DRA3</i>  | Full         | 0                 | 0  | 0               | 0  |
| I     | <i>FLA-A</i> | Full         | 1                 | 2  | 1               | 0  |
| I     | <i>FLA-C</i> | Partial      | 0                 | 2  | 2               | 1  |
| I     | <i>FLA-E</i> | Partial      | 0                 | 0  | 0               | 0  |
| I     | <i>FLA-F</i> | Partial      | 0                 | 1  | 4               | 40 |
| I     | <i>FLA-H</i> | Partial      | 0                 | 0  | 15              | 50 |
| I     | <i>FLA-J</i> | Partial      | 0                 | 0  | 6               | 7  |
| I     | <i>FLA-K</i> | Full         | 0                 | 0  | 0               | 1  |
| I     | <i>FLA-L</i> | Partial      | 0                 | 3  | 1               | 1  |
| I     | <i>FLA-O</i> | Full         | 0                 | 0  | 3               | 4  |
| I     | <i>FLA-Q</i> | Partial      | 0                 | 2  | NA              | NA |

Table S27: **Tested demographic models and their optimized log-likelihood values.** The last model has the largest likelihood. We also perform a total of 100 bootstraps to estimate the variance of the result by randomly selecting the real data. We found the variance of likelihood in the last model is much smaller compared with other models (see Figure 3 legend).

| Model | Scenario                                                                                                                                                | Optimized log-likelihood |
|-------|---------------------------------------------------------------------------------------------------------------------------------------------------------|--------------------------|
| 1     | 2D IM model (ancestral population splits into two sub-populations accompanying with migration from each other.)                                         | -51,979.09               |
| 2     | 2D BIM model (the ancestral population undergoing a bottleneck, and then splits)                                                                        | -77,657.60               |
| 3     | 2D SBR model (population bottleneck followed by population isolation and then population recovering)                                                    | -50,753.12               |
| 4     | 2D ISB model (population isolation after a long time increasing of ancestor population and the isolated populations experience bottleneck respectively) | -43,587.07               |

Table S28: **Summary of real population data calculated from the DaDi result as per Model 4 — 2D ISB (see Figure 3a).**

|                                                                      | Bounds   |          |
|----------------------------------------------------------------------|----------|----------|
|                                                                      | Lower    | Upper    |
| Migration rate from the east subpopulation to the west subpopulation | 0.000994 | 0.001095 |
| Migration rate from the west subpopulation to the east subpopulation | 0.001049 | 0.001166 |
| The population size before split                                     | 134,873  | 150,096  |
| Total size of the east subpopulation after split                     | 35,428   | 39,959   |
| Total size of the west subpopulation after split                     | 119,416  | 133,272  |
| Isolated east subpopulation size after bottleneck                    | 111      | 124      |
| Isolated west subpopulation size after bottleneck                    | 111      | 126      |
| Population increasing time before split in years                     | 100,089  | 113,518  |
| Population split time in years                                       | 11,084   | 12,589   |
| Subpopulations bottleneck time in years                              | 11,208   | 12,728   |

Table S29: **Short list of reproductive system genes with identified function.** Severity of mutations was assessed using the Polyphen2 database [2].

| Ensembl transcript ID | Gene name      | P-value  | Effect description                                                                                                                                                                                    |
|-----------------------|----------------|----------|-------------------------------------------------------------------------------------------------------------------------------------------------------------------------------------------------------|
| ENST00000233078       | <i>DAZ1</i>    | 1.73E-20 | Whole-gene deletion causes azoospermia in human. Cheetah has 1 putative deletion and 2 possibly damaging mutations.                                                                                   |
| ENST00000295228       | <i>INHBB</i>   | 3.58E-07 | 2 probably damaging mutations.                                                                                                                                                                        |
| ENST00000377847       | <i>PAX5</i>    | 1.35E-06 | 1 probably damaging mutation.                                                                                                                                                                         |
| ENST00000368457       | <i>PYGO2</i>   | 1.49E-06 | Several high-confidence possibly damaging SNVs in cheetah: residues 96, 97 and 105 altered in cheetah but highly conserved in other species.                                                          |
| ENST00000374273       | <i>SPAG4</i>   | 4.62E-04 | Potential misalignment.                                                                                                                                                                               |
| ENST00000399635       | <i>TSSK2</i>   | 2.71E-03 | The gene plays an important role in spermatogenesis and is associated with infertility in human. There are 3 cheetah-specific mutations with moderate effect, nonconserved for other Felidae species. |
| ENST00000396368       | <i>KIA0430</i> | 2.84E-03 | The important oogenesis-related gene with several putatively damaging mutations in cheetah.                                                                                                           |
| ENST00000394337       | <i>CCDC135</i> | 3.46E-03 | The important non-conserved gene containing several cheetah-specific mutations.                                                                                                                       |
| ENST00000585580       | <i>TSSK6</i>   | 6.06E-03 | Two cheetah-specific mutations in a conserved region which were identified by PolyPhen2 as benign; also a deletion was located in an interesting region.                                              |
| ENST00000225538       | <i>P2RX1</i>   | 6.08E-03 | 3 cheetah-specific mutations, one of them is benign but is situated after the conserved Cysteine residue.                                                                                             |
| ENST00000356545       | <i>RSPO1</i>   | 1.33E-02 | Potential misalignment.                                                                                                                                                                               |
| ENST00000358526       | <i>AKAP4</i>   | 1.58E-02 | The gene of proved importance for sperm motility. Cheetah has 5 specific missense mutations; 3 of them are probably damaging.                                                                         |
| ENST00000252677       | <i>BMP15</i>   | 1.62E-02 | The gene plays an important role in ovarian development; cheetah has 1 possibly damaging mutation.                                                                                                    |
| ENST00000266991       | <i>DHH</i>     | 2.13E-02 | The gene is associated with gonadal dysgenesis; cheetah has 1 probably damaging mutation.                                                                                                             |
| ENST00000274008       | <i>SPATA5</i>  | 2.31E-02 | 1 probably damaging mutation                                                                                                                                                                          |
| ENST00000341206       | <i>LCN6</i>    | 2.77E-02 | 1 probably damaging mutation                                                                                                                                                                          |
| ENST00000328739       | <i>VMO1</i>    | 4.61E-02 | Potential misalignment.                                                                                                                                                                               |
| ENST00000395858       | <i>MOV10L1</i> | 4.88E-02 | 1 probably damaging mutation                                                                                                                                                                          |



Table S30: **Filtration steps applied to genes related to reproduction system of cheetah.**

| Step | Description                                                                                                                 | # Genes |
|------|-----------------------------------------------------------------------------------------------------------------------------|---------|
| 1    | Full set of reproduction-related human genes according to Gene Ontology (GO term <b>GO:0000003</b> ).                       | 964     |
| 2    | 1:1 orthology relationship for cat, human, dog, cheetah and tiger.                                                          | 656     |
| 3    | Dn/Ds values are significantly higher ( $p < 0.05$ without multiple-test correction) in cheetah than other studied species. | 92      |
| 4    | Genes having direct link with studied disease phenotype according to open source data.                                      | 13      |

Table S31: **Nucleotide composition of differently masked assemblies.** The following repeat-masking tools were applied: RM — RepeatMasker [3], TRF — Tandem Repeat Finder [4], kmer — the k-mer based approach (Figure S15; Subsection of “Materials and Methods”). SL denotes filtration of scaffolds by their length; short scaffolds were removed.

| Assembly             | #Scaffolds | #Total        | Nucleotide composition |             |             |             | %Masked       |       |
|----------------------|------------|---------------|------------------------|-------------|-------------|-------------|---------------|-------|
|                      |            |               | A                      | T           | C           | G           |               |       |
| Non-masked           | 40,077     | 2,375,874,546 | 685,085,510            | 684,898,432 | 481,940,477 | 481,891,179 | 42,058,948    | 1.77  |
| RM + TRF             | 40,077     | 2,375,874,546 | 380,646,313            | 380,798,506 | 275,810,184 | 275,746,994 | 1,062,872,550 | 44.74 |
| RM + TRF + kmer      | 40,077     | 2,375,874,546 | 377,139,850            | 377,291,178 | 272,922,019 | 272,864,219 | 1,075,657,281 | 45.27 |
| RM + TRF + kmer + SL | 1,652      | 2,363,937,210 | 375,835,592            | 375,991,860 | 271,842,430 | 271,784,545 | 1,068,482,783 | 45.20 |

Table S32: **Overview of segmental duplications (SD) on autosomes and coverage of cheetah samples.** AJU\_NAM and AJU\_TAN stand for cheetahs (*A. jubatus*) from Namibia and Tanzania, respectively.

| Sample    | Number of autosomal SD | Bps in autosomal SD | Sample Coverage |
|-----------|------------------------|---------------------|-----------------|
| AJU_NAM_1 | 520                    | 4,744,441           | 4.23            |
| AJU_TAN_1 | 490                    | 4,492,923           | 5.39            |
| AJU_TAN_2 | 460                    | 4,354,394           | 5.89            |
| AJU_NAM_2 | 523                    | 4,883,730           | 5.05            |
| AJU_TAN_3 | 568                    | 5,430,887           | 4.73            |
| AJU_NAM_3 | 486                    | 4,542,034           | 5.73            |

## References

- [1] Yuhki N, Mullikin JC, Beck T, Stephens R, O'Brien SJ. Sequences, annotation and single nucleotide polymorphism of the major histocompatibility complex in the domestic cat. *PLoS One*. 2008;3(7):e2674.
- [2] Adzhubei IA, Schmidt S, Peshkin L, Ramensky VE, Gerasimova A, Bork P, et al. A method and server for predicting damaging missense mutations. *Nature Methods*. 2010;7(4):248–249.
- [3] Smit AF, Hubley R, Green P. RepeatMasker Open-3.0; 1996–2010.
- [4] Benson G. Tandem repeats finder: a program to analyze DNA sequences. *Nucleic Acids Research*. 1999;27(2):573.
